# Supplementary material for: Novel insights into chlorine dioxide based disinfection mechanisms – investigation of the reaction with amino acids
Source: Royal Society of Chemistry journal article supplement (doi:10.1039/d1ew00812a), 2022-01-01
Supplement: d1ew00812a1.pdf [file d1ew00812a1.pdf]

1 **Novel insights in chlorine dioxide based disinfection mechanism-**  
2 **Investigation of the reaction with amino acids**

3 **Supplementary information**

4

5 Mischa Jütte<sup>1</sup>, Mohammad S. Abdighahroudi<sup>1</sup>, Janine V. Große<sup>1</sup>, Christoph Schüth<sup>2,3</sup>, and  
6 Holger V. Lutze<sup>1,3,4</sup>

7

8 <sup>1</sup>Technical University of Darmstadt, Institute IWAR, Chair of environmental analytics and  
9 pollutants, Franziska-Braun-Straße 7, 64287 Darmstadt, Germany

10 <sup>2</sup>Technical University of Darmstadt, Institute of Applied Geosciences, Schnittspahnstr. 9, 64287  
11 Darmstadt, Germany

12 <sup>3</sup>IWW Water Centre, Moritzstraße 26, D-45476 Mülheim an der Ruhr, Germany

13 <sup>4</sup>Centre for Water and Environmental Research (ZWU), Universitätsstraße 5, D-45141 Essen,  
14 Germany

15

16

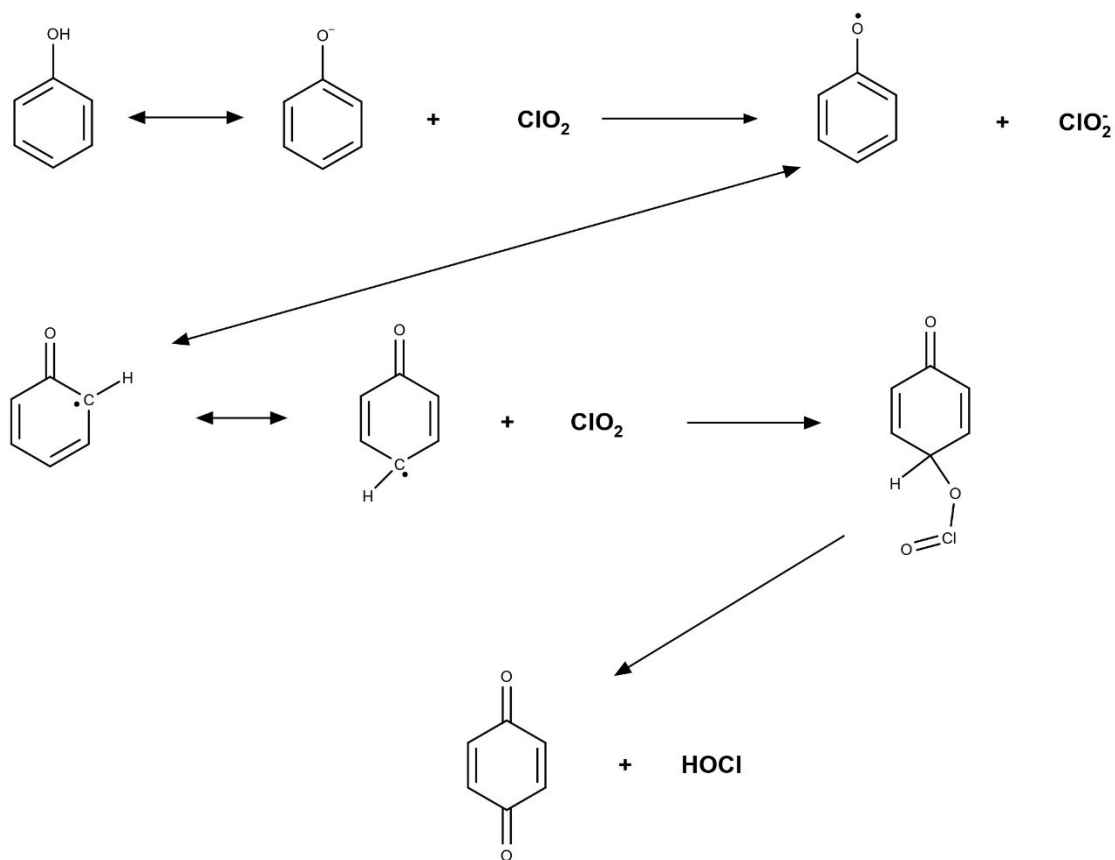

17

18 **Figure S1: Mechanistic pathway of intrinsic formation of FAC during the reaction of phenol**  
 19 **with ClO2 according to Wajon et al. 1982.<sup>1</sup> In the first step, phenol reacts with one molecule**  
 20 **of ClO2 under the formation of ClO2^- and a phenoxy-radical. Afterward, the radical stabilizes**  
 21 **in the para position. The phenoxy-radical reacts with another molecule of ClO2 and forms**  
 22 **an OCIO-adduct in para-position. Eventually, the adduct disproportionates to FAC and**  
 23 **benzoquinone.**

24 **Table S1: Chemicals used in this research project.**

| Name                                | Purity [%]    | Purpose of use                                  | Manufacturer                                                |
|-------------------------------------|---------------|-------------------------------------------------|-------------------------------------------------------------|
| Acetic acid                         | > 99.7        | Eluent (LC)                                     | Alfa Aesar (Haverhill, Massachusetts, USA)                  |
| Acetonitrile                        | > 99.9        | Eluent (LC)                                     | Honeywell   Riedel-de Haen (Charlotte, North Carolina, USA) |
| Ammonium-molybdate(VI)-tetrahydrate | > 99          | Post column catalyzer                           | Acros Organics (Fair Lawn, New Jersey, USA)                 |
| Disodium phosphate                  | > 99          | pH buffer                                       | Merck (Darmstadt, Germany)                                  |
| Glycine                             | > 99          | HOCl Scavenger                                  | Alfa Aesar (Haverhill, Massachusetts, USA)                  |
| Indol                               | > 99          | Competitor, model compound                      | Sigma-Aldrich (St. Louis, Missouri, USA)                    |
| Monosodium phosphate                | 98            | pH buffer                                       | Acros Organics (Fair Lawn, New Jersey, USA)                 |
| N-Acetyl-L-Tryptophan               | ≥ 99          | Compound under study                            | Sigma-Aldrich (St. Louis, Missouri, USA)                    |
| N-Acetyl-L-Tyrosine                 | > 99          | Compound under study                            | TCI (Tokyo, Japan)                                          |
| Nitrogen                            | 99.999        | ClO <sub>2</sub> production                     | Air Liquide (Paris, France)                                 |
| Ortho-phosphoric acid               | 85            | pH buffer                                       | VWR (Radnor, Pennsylvania, USA)                             |
| Phenol                              | > 99 %        | Competitor                                      | Sigma-Aldrich (St. Louis, Missouri, USA)                    |
| Potassium iodide                    | > 99          | Post column reagent                             | Acros Organics (Fair Lawn, New Jersey, USA)                 |
| Sodium acetate                      | > 99          | Eluent (LC)                                     | Sigma-Aldrich (St. Louis, Missouri, USA)                    |
| Sodium carbonate                    | 99.5          | Eluent (IC)                                     | Acros Organics (Fair Lawn, New Jersey, USA)                 |
| Sodium chlorate                     | > 99          | Calibration standard                            | Acros Organics (Fair Lawn, New Jersey, USA)                 |
| Sodium chloride                     | > 99.5        | Calibration standard                            | Honeywell   Fluka (Charlotte, North Carolina, USA)          |
| Sodium chlorite                     | 80            | Calibration standard                            | Honeywell   Fluka (Charlotte, North Carolina, USA)          |
| Sodium hypochlorite                 | 11 – 15 % FAC | Oxidant                                         | Alfa Aesar (Haverhill, Massachusetts, USA)                  |
| Sodium persulfate                   | > 99          | ClO <sub>2</sub> production                     | Carl Roth (Karlsruhe, Germany)                              |
| Sodium phosphate                    | 96            | pH buffer                                       | Sigma-Aldrich (St. Louis, Missouri, USA)                    |
| Sulfamethoxazole                    | > 98          | Competitor                                      | Sigma-Aldrich (St. Louis, Missouri, USA)                    |
| Sulfuric acid                       | 95            | Chemical suppressor (IC) / Post column reaction | VWR (Radnor, Pennsylvania, USA)                             |

25

26

27 **Table S2: Instruments used in this research project.**

| Name                  | Component                     | Description                                                | Manufacturer                                    |
|-----------------------|-------------------------------|------------------------------------------------------------|-------------------------------------------------|
| Ion-Chromatography    | Autosampler                   | Dionex AS-AP                                               | Thermo scientific (Waltham, Massachusetts, USA) |
|                       | Column                        | Asupp7 – 250mm/4.0 $\mu$ m                                 | Metrohm (Herisau, Swiss)                        |
|                       | Column department             | Dionex ICS-6000 DC                                         | Thermo scientific (Waltham, Massachusetts, USA) |
|                       | Conductivity detector         |                                                            | Thermo scientific (Waltham, Massachusetts, USA) |
|                       | Pump 1 (Eluent)               | Dionex ICS-6000 SP                                         | Thermo scientific (Waltham, Massachusetts, USA) |
|                       | Pump 2 (Suppressor)           | Dionex AXP                                                 | Thermo scientific (Waltham, Massachusetts, USA) |
|                       | Pump 3 (Post column reaction) | Peristaltic pump                                           | Ismatec (Wertheim, Germany)                     |
|                       | Software                      | Chromeleon Console                                         | Thermo scientific (Waltham, Massachusetts, USA) |
|                       | Suppressor                    | Dionex ACRS 500                                            | Thermo scientific (Waltham, Massachusetts, USA) |
|                       | UV detector                   | Dionex UltiMate 3000 Diode Array Detection                 | Thermo scientific (Waltham, Massachusetts, USA) |
| Liquid Chromatography | Autosampler                   | Dionex AS-AP                                               | Thermo scientific (Waltham, Massachusetts, USA) |
|                       | Column                        | Acclaim Trinity P1 3 $\mu$ m – 2.1 $\mu$ m $\times$ 150 mm | Thermo scientific (Waltham, Massachusetts, USA) |
|                       | Column department             | Dionex ICS-6000 DC                                         | Thermo scientific (Waltham, Massachusetts, USA) |
|                       | Pump 1 (Eluent)               | Dionex ICS-6000 SP                                         | Thermo scientific (Waltham, Massachusetts, USA) |
|                       | Software                      | Chromeleon Console                                         | Thermo scientific (Waltham, Massachusetts, USA) |
|                       | UV detector                   | Dionex UltiMate 3000 Diode Array Detection                 | Thermo scientific (Waltham, Massachusetts, USA) |
| Photometer            | Photometer                    | Specord 200 Plus                                           | AnalytikJena (Jena, Germany)                    |
| pH-meter              | pH-meter                      | Terminal 740                                               | WTW Series inoLab                               |

|                |                          |                |                                          |
|----------------|--------------------------|----------------|------------------------------------------|
|                |                          |                | (Weilheim, Germany)                      |
| Balance        | Balance                  | SM2285Di-ION-C | VWR (Radnor, Pennsylvania, USA)          |
| Reaction tubes | 15 mL CellStar® tubes    | Polypropylene  | Greiner bio-one (Frickenhausen, Germany) |
| HPLC Vials     | 1.5 mL Short thread vial | Amber glass    | VWR (Radnor, Pennsylvania, USA)          |
| HPLC Vials     | 1.5 mL Short thread vial | Polypropylene  | VWR (Radnor, Pennsylvania, USA)          |

29 **Table S3: Liquid chromatography methods used in this research project. Eluent A = 20**  
 30 **mM sodium acetate buffer pH 5; Eluent B = ACN.**

| No. Method | Total time [min] | Gradient program |           |    |    | Compound (Ret. Time [Min])                                     |
|------------|------------------|------------------|-----------|----|----|----------------------------------------------------------------|
|            |                  | Time             | Flow rate | %A | %B |                                                                |
| 1          | 31               | 0.000            | 0.3       | 80 | 20 | Phenol (4.0),<br>indol (7.9),<br>SMX (10.5),<br>NAL-Trp (22.6) |
|            |                  | 6.000            | 0.3       | 80 | 20 |                                                                |
|            |                  | 10.000           | 0.4       | 40 | 60 |                                                                |
|            |                  | 22.000           | 0.4       | 40 | 60 |                                                                |
|            |                  | 26.000           | 0.3       | 80 | 20 |                                                                |
| 2          | 22               | 0.0              | 0.3       | 80 | 20 | Phenol (4.0),<br>NAL-Tyr (14.6)                                |
|            |                  | 6.0              | 0.3       | 80 | 20 |                                                                |
|            |                  | 10.0             | 0.4       | 40 | 60 |                                                                |
|            |                  | 14.0             | 0.4       | 40 | 60 |                                                                |
|            |                  | 18.0             | 0.3       | 80 | 20 |                                                                |

31

32 **Table S4: Ion chromatography methods used in this research project. Eluent A =pure**  
 33 **H<sub>2</sub>O; Eluent B = 4 mM Na<sub>2</sub>CO<sub>3</sub>. The retention times for Cl-Gly and ClO<sub>2</sub><sup>-</sup> are given for**  
 34 **conductivity and UV detector (CD/UV).**

| No. Method | Total time [min] | Gradient program |           |    |     | Compound (Ret. Time [Min])                                                                                                           |
|------------|------------------|------------------|-----------|----|-----|--------------------------------------------------------------------------------------------------------------------------------------|
|            |                  | Time             | Flow rate | %A | %B  |                                                                                                                                      |
| 1          | 40               | 0.000            | 0.75      | 70 | 30  | Cl-Gly (11.3/12.0),<br>ClO <sub>2</sub> <sup>-</sup> (12.3/12.9),<br>Cl <sup>-</sup> (15.5),<br>ClO <sub>3</sub> <sup>-</sup> (25.3) |
|            |                  | 16.000           | 0.75      | 70 | 30  |                                                                                                                                      |
|            |                  | 16.001           | 0.75      | 0  | 100 |                                                                                                                                      |
|            |                  | 32.000           | 0.75      | 0  | 100 |                                                                                                                                      |
|            |                  | 32.001           | 0.75      | 70 | 30  |                                                                                                                                      |

35

36

37

38

39

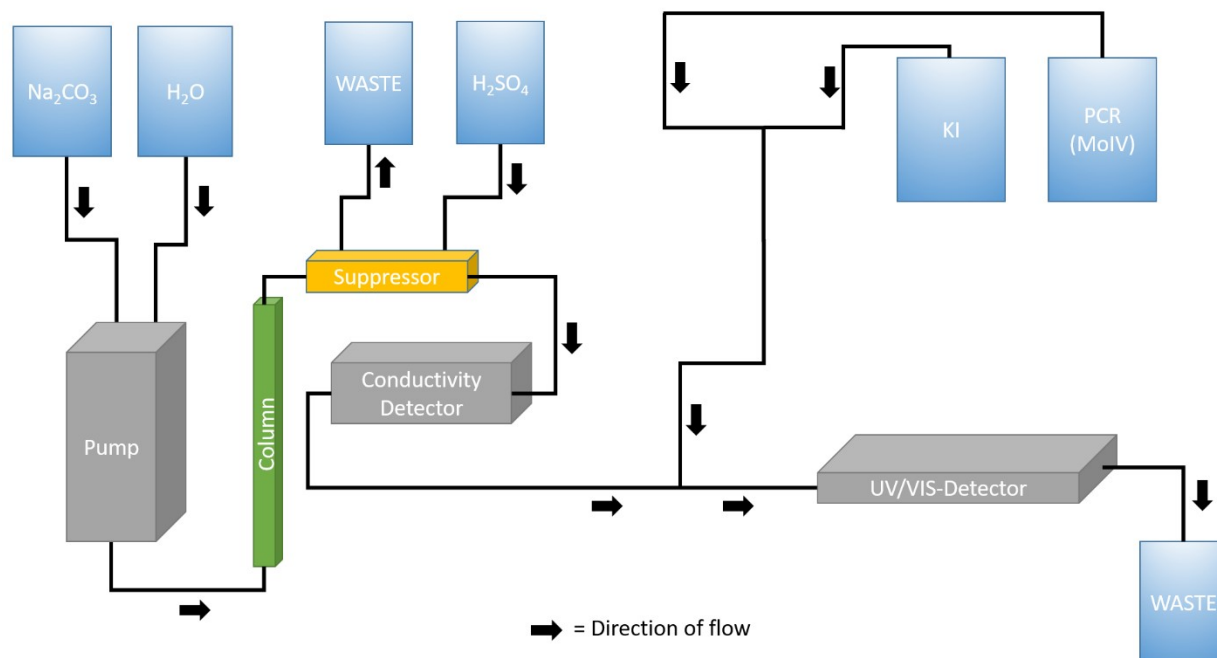

40

41 **Figure S2: Set up of IC-CD-PCR-UV. A gradient pump is transporting the eluent A: H<sub>2</sub>O**  
 42 **and eluent B: 4 mM Na<sub>2</sub>CO<sub>3</sub> towards the column. After the column, a chemical**  
 43 **suppression is installed using 20 mM H<sub>2</sub>SO<sub>4</sub> (1.0 mL/min). Then the analysts are detected**  
 44 **by a conductivity detector. To increase the sensitivity for Cl-Gly and ClO<sub>2</sub><sup>-</sup> a post column**  
 45 **reaction is installed, whereby a 0.27 M potassium iodide (KI) and a catalyzing solution**  
 46 **(containing 0.027 mM ammonium molybdate(VI) tetrahydrate and 0.1 M H<sub>2</sub>SO<sub>4</sub>) are added**  
 47 **to the system (0.1 mL/min each solution). During this reaction iodide is oxidized to**  
 48 **triiodide, which has a high absorption at  $\lambda = 352 \text{ nm}$  ( $\epsilon_{352} = 26,000 \text{ M}^{-1} \text{ cm}^{-1}$ ).<sup>2</sup>**

49

50

51

52

53

54

55

56

57

58

59

60

61 **Text S1: Calculation of necessary scavenger concentrations**

62 In most experiments, scavengers are needed to scavenge the intrinsic formed FAC. For this  
63 purpose glycine is used ( $k(\text{glycine} + \text{HOCl}) = 1.5 \times 10^5 \text{ M}^{-1} \text{ s}^{-1}$ )<sup>3</sup>. To calculate the necessary  
64 concentration of glycine ([Scavenger]), Formula S1 is used.

65

$$f(\text{Scavenger} + \text{HOCl}) = \frac{k(\text{Scavenger} + \text{HOCl}) \times [\text{Scavenger}]}{\sum (k(\text{Compound} + \text{HOCl}) \times [\text{Compound}])}$$

66  
67 (Formula S1)

68

69 The compound under study ([Compound]) was always 0.0001 M, the reaction rate constants  
70 ( $k(\text{compound} + \text{HOCl})$ ) are taken from Pattison et al. 2002<sup>4</sup> ( $k(\text{NAL-tyrosine} + \text{HOCl}) = 4.7 \times 10^1$   
71  $\text{M}^{-1} \text{ s}^{-1}$  &  $k(\text{NAL-tryptophan} + \text{HOCl}) = 7.8 \times 10^3 \text{ M}^{-1} \text{ s}^{-1}$  both at pH 7.2 – 7.4). According to Formula  
72 S1 it was calculated how much glycine was needed to scavenge a fraction ( $f(\text{Scavenger} + \text{HOCl})$ )  
73 of 99.9 % HOCl ( $f = 0.999$ ).

74



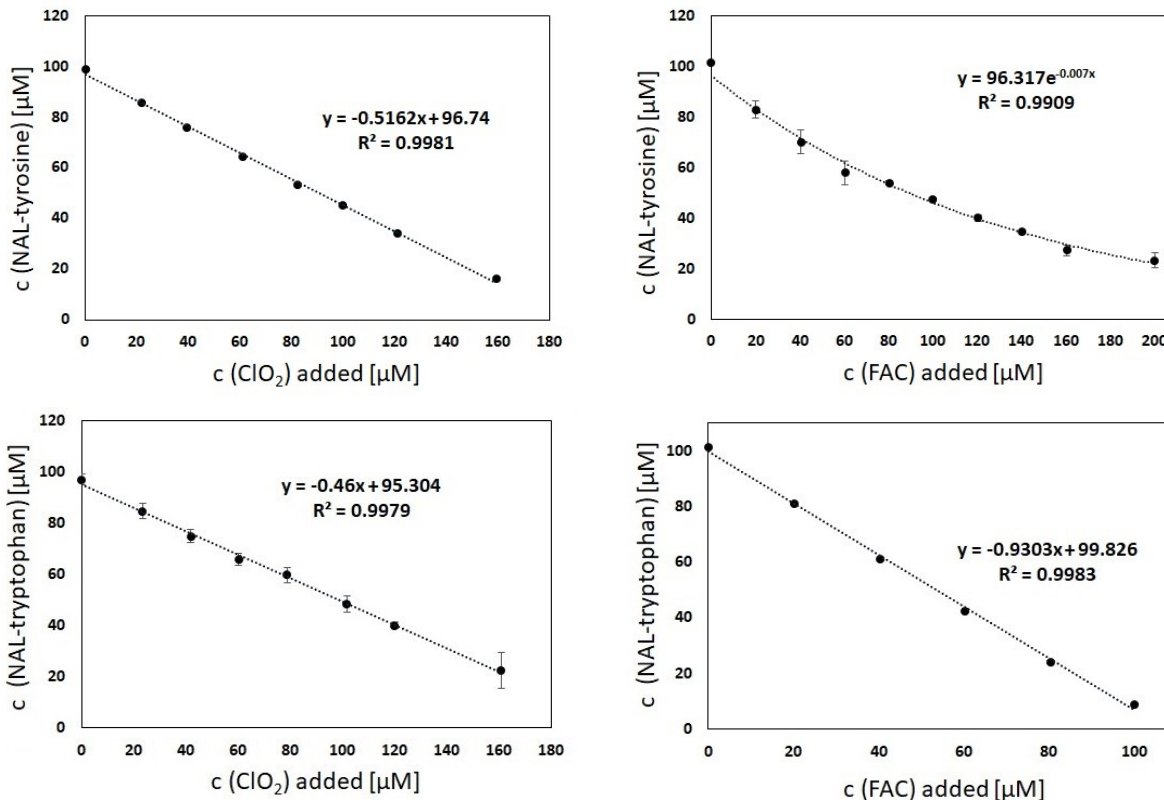

75 **Figure S3: Stoichiometry results.** Stoichiometry has been determined for both amino acids  
 76 **with oxidants at pH 7.** Reaction conditions: 0.1 mM of the corresponding amino acids, 5  
 77 **mM of phosphate buffer, and, in the case of determining the stoichiometry for  $\text{ClO}_2$ , 10 mM**  
 78 **glycine was added to scavenge intrinsic formed FAC, which would bias the final results.**  
 79 **All experiments have been carried out in triplicates, and the error bars are representing the**  
 80 **standard deviation of the results.**

81

82 **Table S5: Measured impurities of  $\text{ClO}_2$  stock solution.** Percentage is based on the initial  
 83 **concentration of  $\text{ClO}_2$ , which was measured to be 17.225 mM.**

|                     | $\text{Cl}^-$ | $\text{ClO}_2^-$ | $\text{ClO}_3^-$ | FAC | Total |
|---------------------|---------------|------------------|------------------|-----|-------|
| <i>Impurity [%]</i> | $0.153 \pm$   | $0.118 \pm$      | $2.166 \pm$      | –   | 2.438 |
|                     | 0.002         | 0.003            | 0.038            |     |       |

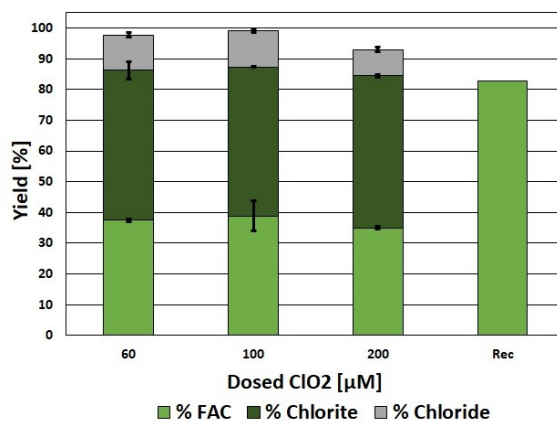

85

86 **Figure S4: Chlorine balance of ClO<sub>2</sub> during the reaction with indol at pH 7.** The reaction  
 87 solution contained 10 mM glycine, 5 mM phosphate buffer, and 0.1 mM indol. The experiment has  
 88 been carried out in triplicates, and the error bars are representing the standard deviation of the  
 89 results.

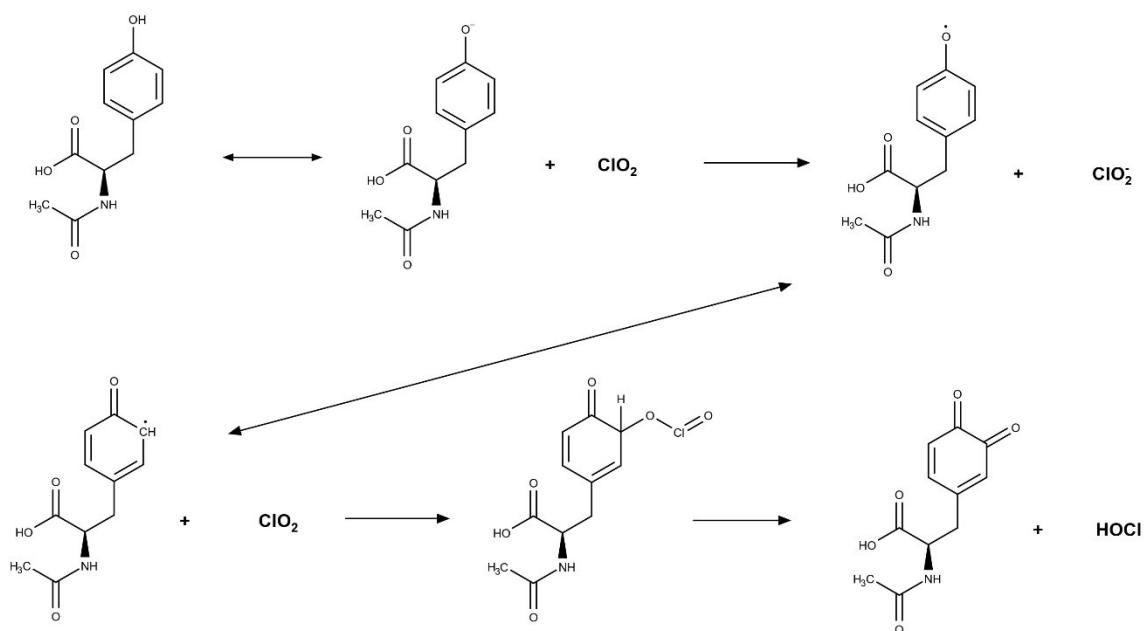

91 **Figure S5: Mechanistic pathway of intrinsic formation of FAC during the reaction of phenol**  
 92 **with ClO<sub>2</sub> adapted from Napolitano et al. 2005.<sup>5</sup>** In the first step, NAL-tyrosine reacts with  
 93 **one molecule of ClO<sub>2</sub> under the formation of ClO<sub>2</sub><sup>-</sup> and a phenoxy-radical.** Afterwards the  
 94 **redistribution of the radical location to a more stable position takes place.** The phenoxy-  
 95 **radical reacts with another molecule of ClO<sub>2</sub> and forms an OClO-adduct in ortho-position.**  
 96 **Eventually, the adduct breaks down to a keto group and HOCl.**

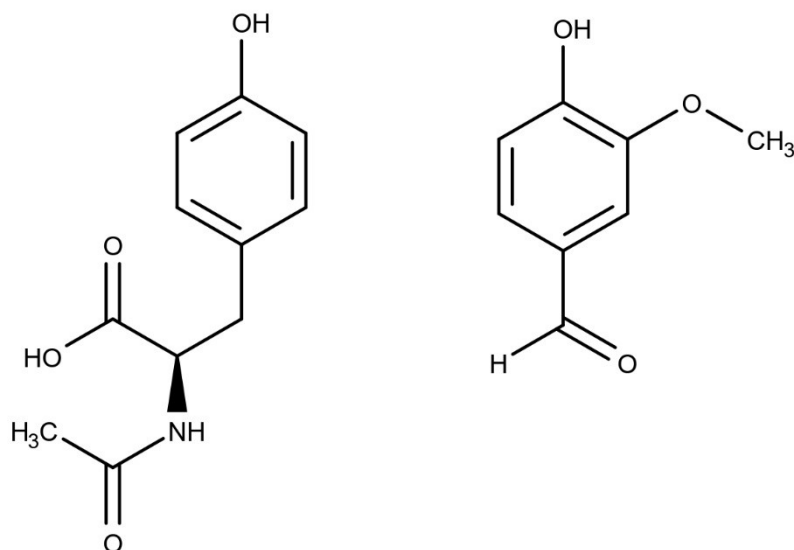

97  
98 **Figure S6: Chemical structure of NAL-tyrosine (left) and vanillin (right).**

99

100

#### 101 Literature

- 102 (1) Wajon, J. E.; Rosenblatt, D. H.; Burrows, E. P. Oxidation of Phenol and  
103 Hydroquinone by Chlorine Dioxide. *Environ. Sci. Technol.* **1982**, *16* (7), 396–402.
- 104 (2) Abdighahroudi, M. S.; Schmidt, T. C.; Lutze, H. V. Determination of Free Chlorine  
105 Based on Ion Chromatography—Application of Glycine as a Selective Scavenger.  
106 *Anal. Bioanal. Chem.* **2020**, *412* (28), 7713–7722.
- 107 (3) Deborde, M.; von Gunten, U. Reactions of Chlorine with Inorganic and Organic  
108 Compounds during Water Treatment-Kinetics and Mechanisms: A Critical Review.  
109 *Water Res.* **2008**, *42* (1–2), 13–51.
- 110 (4) Pattison, D. I.; Davies, M. J. Absolute Rate Constants for the Reaction of  
111 Hypochlorous Acid with Protein Side Chains and Peptide Bonds. *Chem. Res.*  
112 *Toxicol.* **2001**, *14* (10), 1453–1464.
- 113 (5) Napolitano, M. J.; Green, B. J.; Nicoson, J. S.; Margerum, D. W. Chlorine Dioxide  
114 Oxidations of Tyrosine, N-Acetyltyrosine, and Dopa. *Chem. Res. Toxicol.* **2005**, *18*  
115 (3), 501–508.

116
